# Supplementary material for: Hydrodeoxygenation of oleic acid over NiMo bimetallic catalysts supported on niobium phosphate
Source: Royal Society of Chemistry journal article supplement (doi:10.1039/d2nj05343h), 2023-01-01
Supplement: d2nj05343h1.pdf [file d2nj05343h1.pdf]

## Supporting Information

### Hydrodeoxygenation of Oleic Acid over NiMo Bimetallic Catalysts Supported on Niobium Phosphate

Ruiping Wei,<sup>\*a</sup> Lixiang Zhang,<sup>a</sup> Mengyuan Tian,<sup>a</sup> Zhaotian Cai,<sup>a</sup> Zhenyu Shao,<sup>a</sup> Lijing Gao,<sup>a</sup> Jin Zhang,<sup>a</sup> Xiaoxuan Guo,<sup>a</sup> Guomin Xiao<sup>\*a</sup>

<sup>a</sup> School of Chemistry and Chemical Engineering, Southeast University, Nanjing, 211189, P.R. China

E-mail: [weiruip@seu.edu.cn](mailto:weiruip@seu.edu.cn), [Xiaogm426@gmail.com](mailto:Xiaogm426@gmail.com)

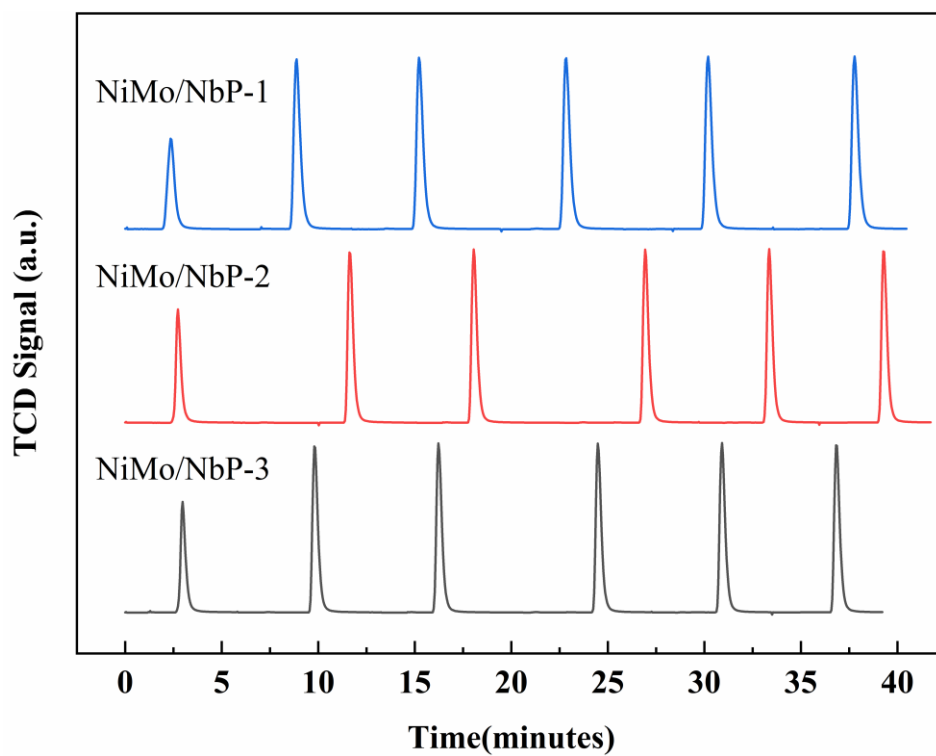

Fig. S1 H<sub>2</sub> pulse chemisorption curves of catalysts

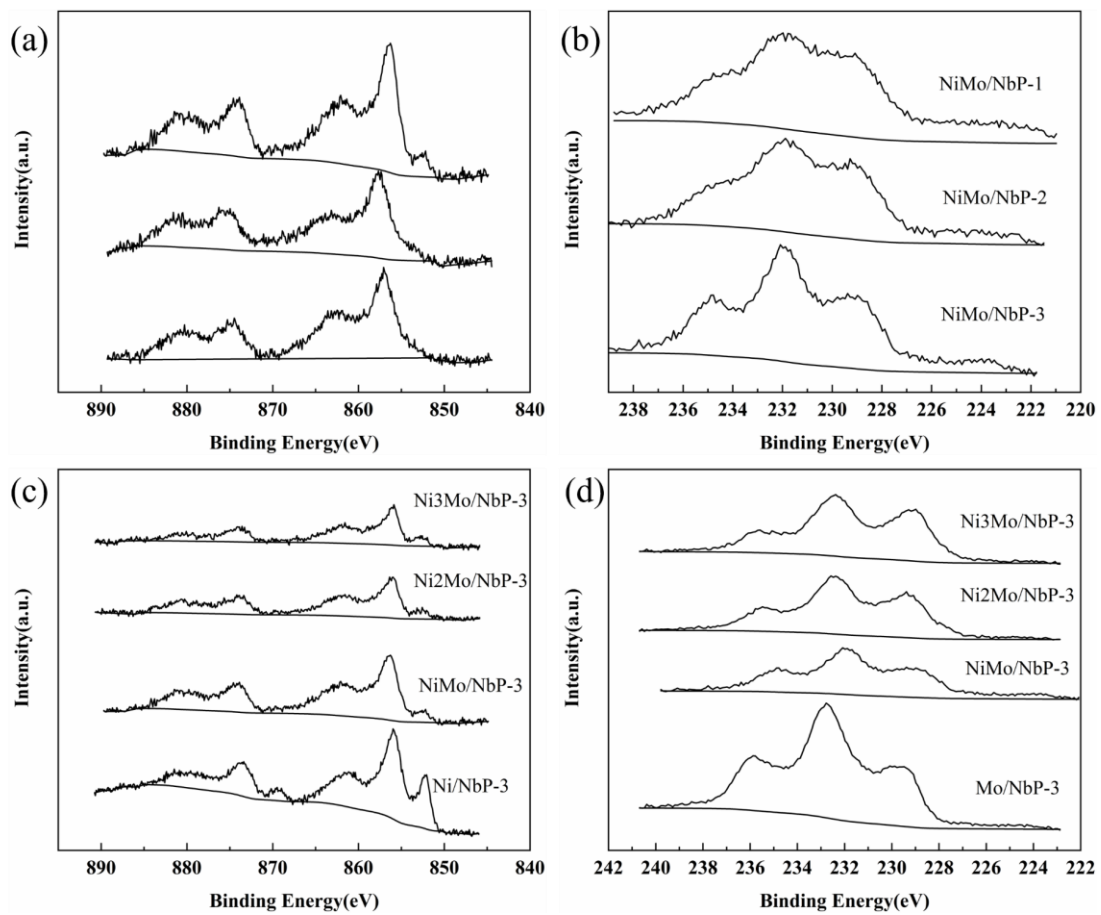

Fig. S2 XPS spectra of Ni 2p and Mo 3d of reduced catalysts.
